# Supplementary material for: Zinc-motivated Fe/Fe5C2/Fe1−xS@Fe–N–C active sites grown on N-doped porous carbon toward efficient oxygen reduction reaction in zinc-air batteries
Source: Royal Society of Chemistry journal article supplement (doi:10.1039/d2dt03699a), 2023-01-01
Supplement: d2dt03699a1.pdf [file d2dt03699a1.pdf]

# **Zinc-motivated Fe/Fe<sub>5</sub>C<sub>2</sub>/Fe<sub>1-x</sub>S@ Fe-N-C active sites grown on N-doped porous carbon toward efficient oxygen reduction reaction in zinc-air batteries**

*Qilong Ye<sup>a</sup>, Mengwei Li<sup>a</sup>, Sanying Hou<sup>b</sup>, Yijie Deng<sup>a,\*</sup>, Junming Luo<sup>c,\*</sup> and Xinlong Tian<sup>c,1</sup>*

<sup>a</sup>School of Resource Environment and Safety Engineering, University of South China, Hengyang 421001, China

<sup>b</sup>Chemistry and Chemical Engineering, University of South China, Hengyang 421001, China

<sup>c</sup>State Key Laboratory of Marine Resource Utilization in South China Sea, Hainan Provincial Key Lab of Fine Chemistry, School of Chemical Engineering and Technology, Hainan University, Haikou 570228, China

---

<sup>1</sup> Corresponding authors, E-mail addresses: dengyijie19891009@163.com; tianxl@hainanu.edu.cn; luojunming@hainanu.edu.cn

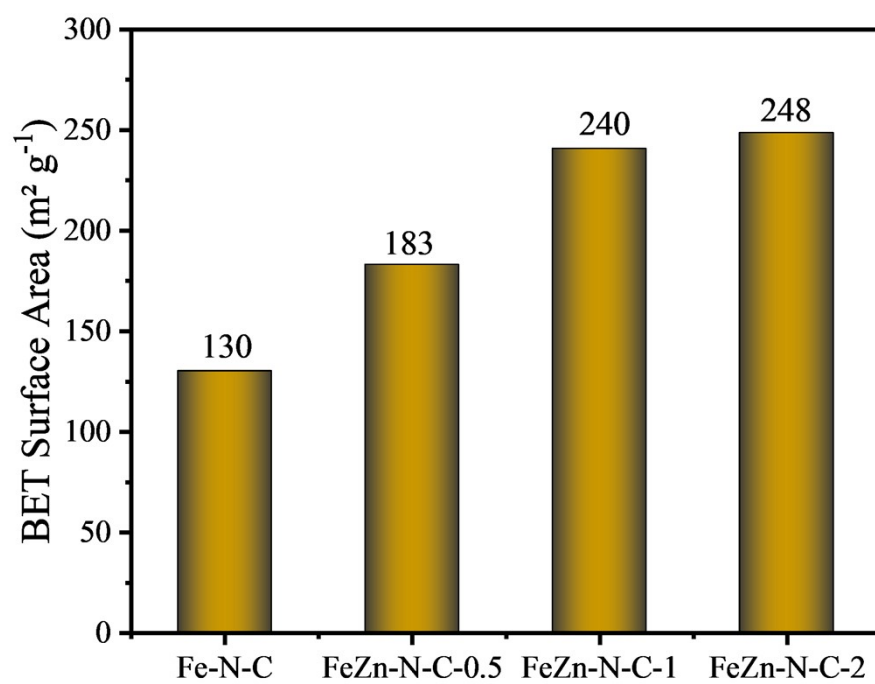

Fig. S1 Specific surface area of the prepared catalysts.

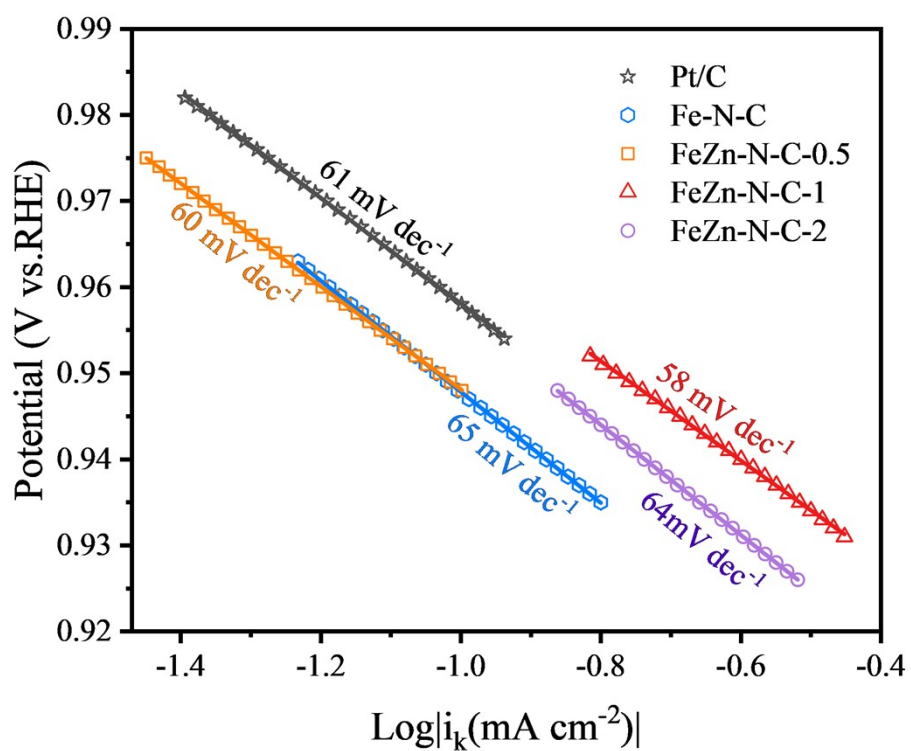

Fig. S2 Tafel slopes of Fe-N-C, FeZn-N-C-0.5, FeZn-N-C-1, FeZn-N-C-2 and Pt/C in O<sub>2</sub>-saturated 0.1 M KOH.

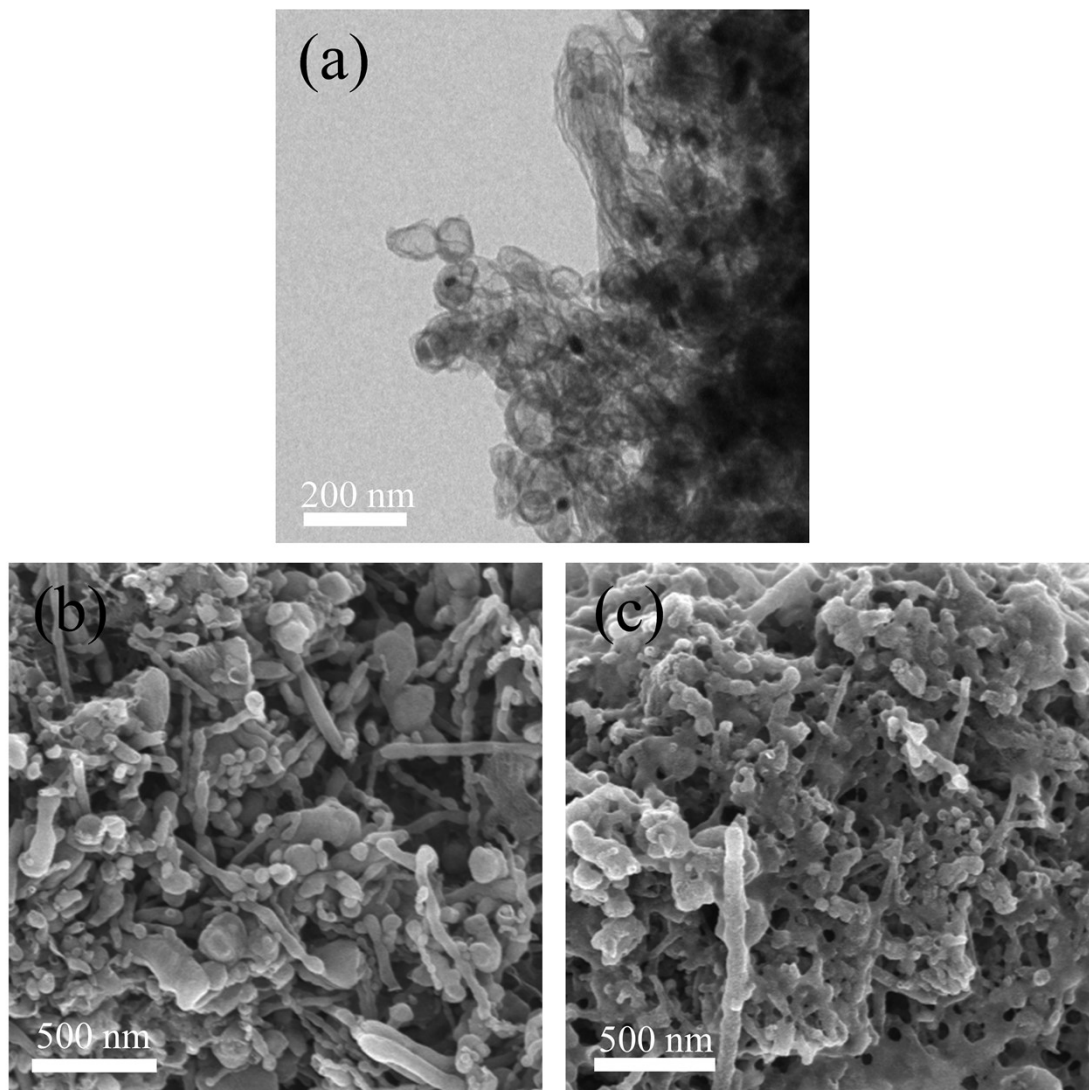

Fig. S3 (a) TEM image of FeZn-N-C-1 after more than 40000 s stability test. (b) SEM image of FeZn-N-C-1 (c) SEM image of FeZn-N-C-1 after more than 40000 s stability test.

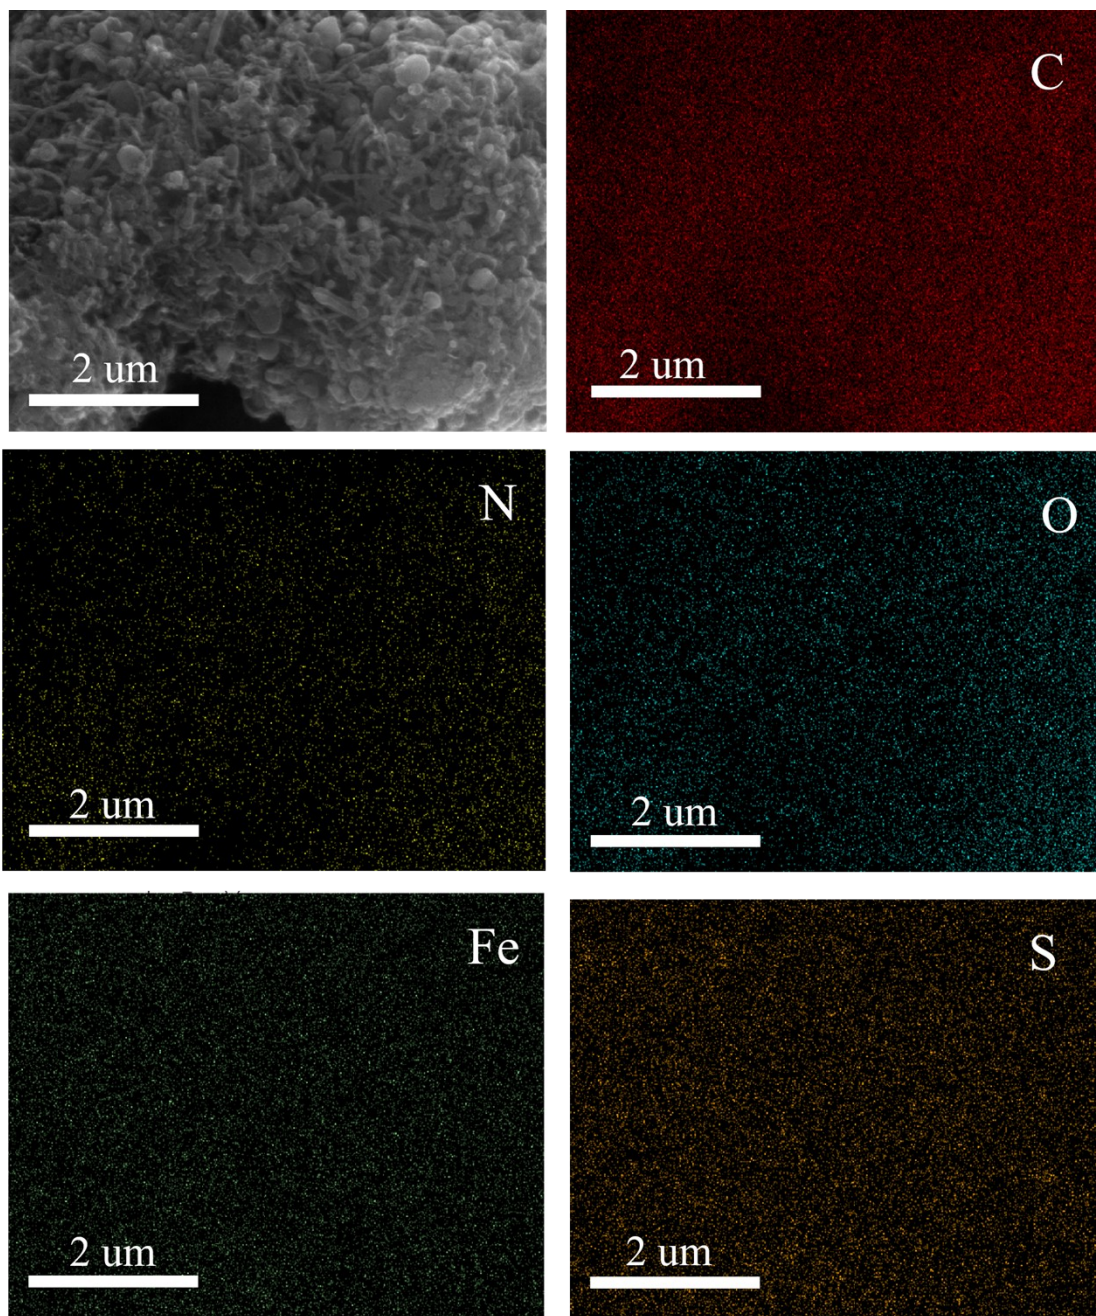

Fig. S4 SEM elemental mapping image of FeZn-N-C-1.

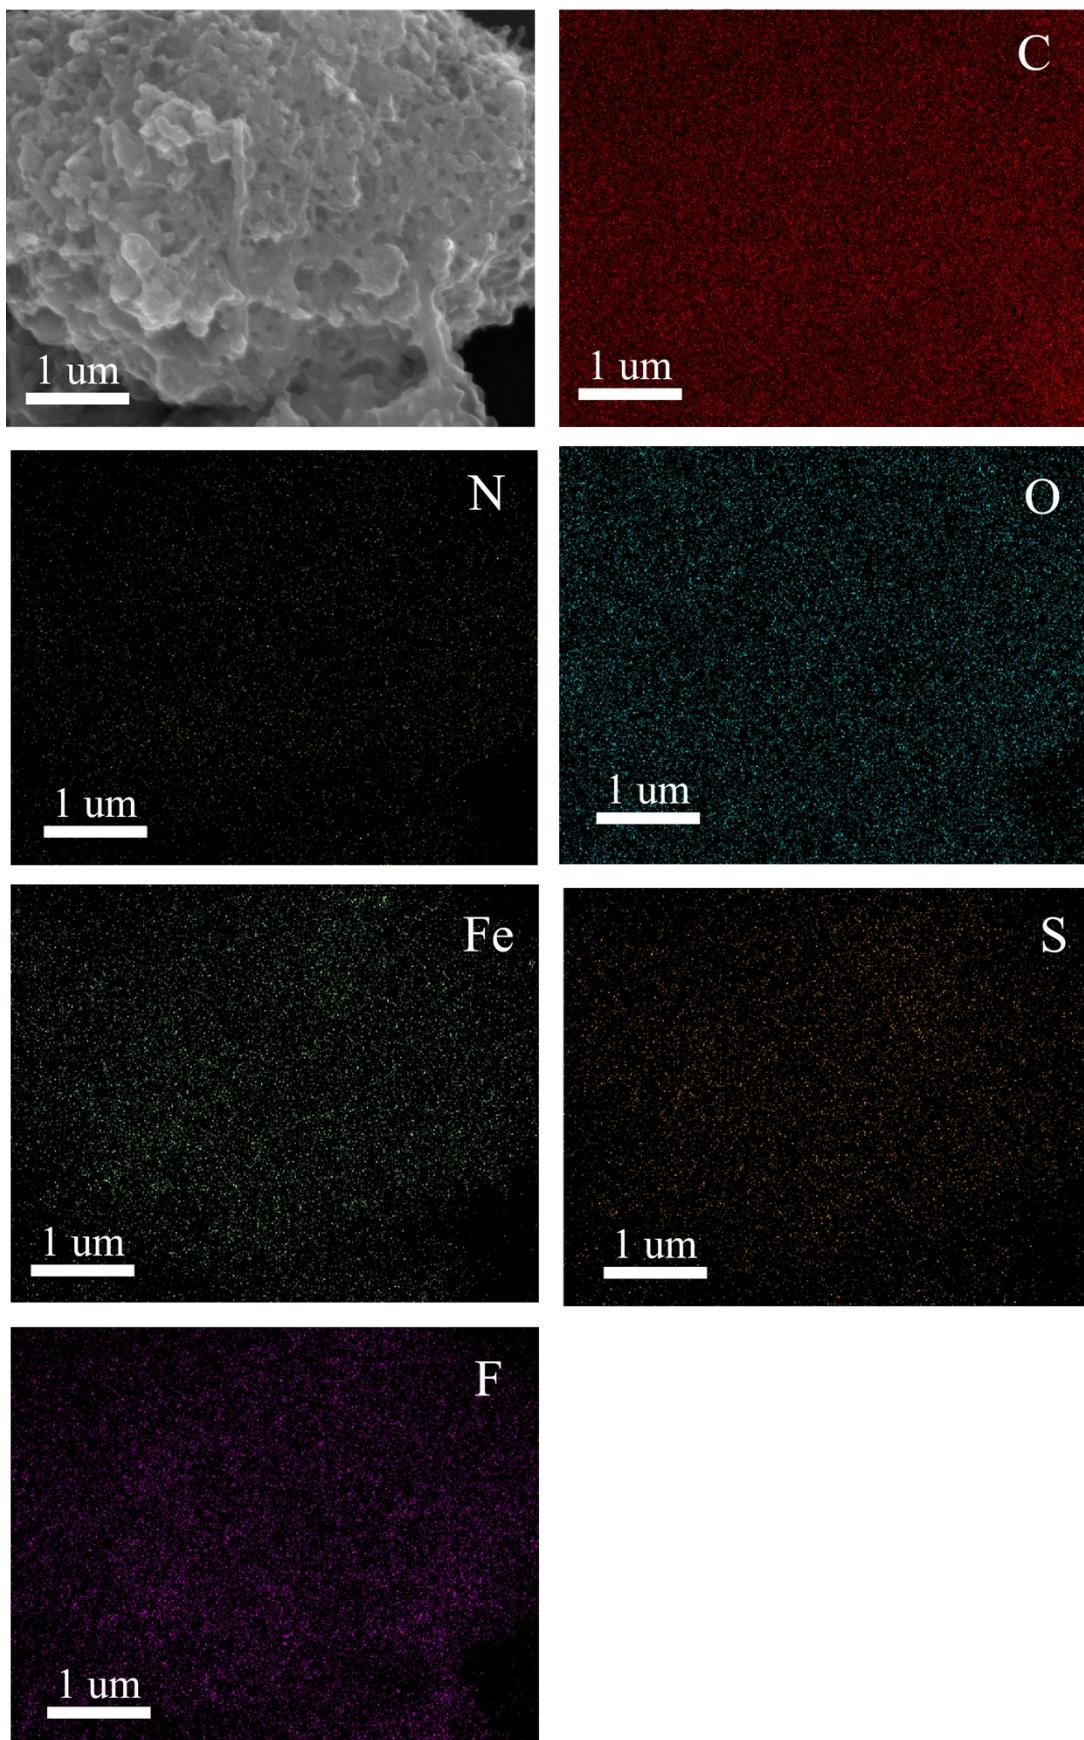

Fig. S5 SEM elemental mapping image of FeZn-N-C-1 after more than 40000 s stability test.

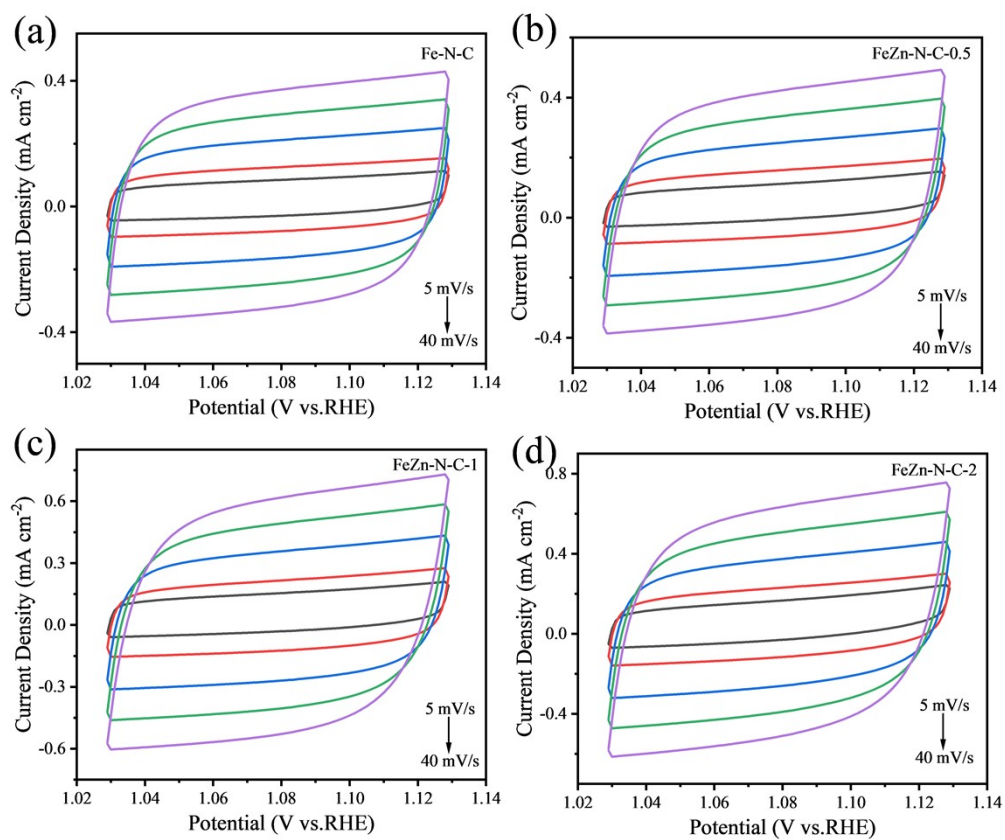

Fig. S6 CV curves for (a) Fe-N-C, (b) FeZn-N-C-0.5, (c) FeZn-N-C-1 and (d) FeZn-N-C-2 at different scan rates. (Scanning rate: 5 mV/s, 10 mV/s, 20 mV/s, 30 mV/s, 40 mV/s).

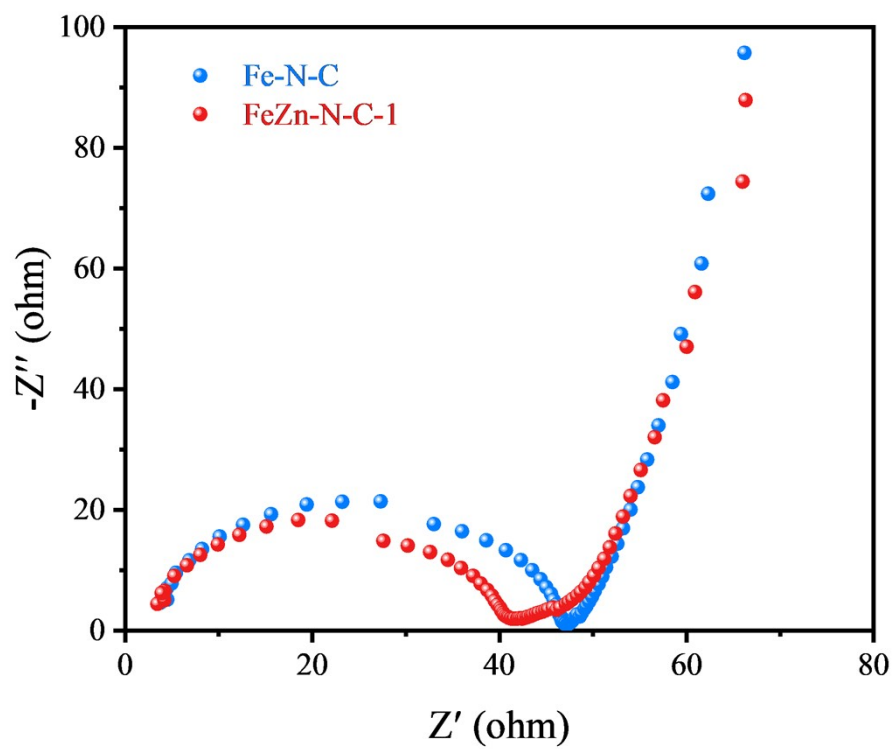

Fig. S7 The electrochemical impedance spectra results of Fe-N-C and FeZn-N-C-1 in  $O_2$ -saturated 0.1 M KOH.



**Table. S1 A comparative table of the present work and the recently reported ORR performance of Fe-N-C catalysts in alkaline media.**

| Materials                                            | $E_{1/2}$ (V) (vs. RHE) in 0.1 M KOH | References |
|------------------------------------------------------|--------------------------------------|------------|
| FeZn-N-C-1                                           | 0.846                                | This work  |
| Fe SA-NSC-900                                        | 0.860                                | [1]        |
| Fe <sub>2</sub> N@NCNTs                              | 0.860                                | [2]        |
| Fe-Co/Co <sub>3</sub> O <sub>4</sub> @NC-900         | 0.840                                | [3]        |
| Se/Fe-Co <sub>3</sub> O <sub>4</sub> /N-CNs          | 0.800                                | [4]        |
| Fe/Fe <sub>3</sub> C/FeN <sub>0.0324</sub> @N-GC-850 | 0.870                                | [5]        |
| Fe/Fe <sub>3</sub> C@N-doped CNTs                    | 0.863                                | [6]        |
| FeNC-950                                             | 0.840                                | [7]        |
| FeSb/NC                                              | 0.830                                | [8]        |
| Fe-N-C/MUS                                           | 0.860                                | [9]        |
| FeNFC800                                             | 0.829                                | [10]       |
| FeNC-24                                              | 0.852                                | [11]       |
| FeCo/FeCoP@NMn-CNS-800                               | 0.840                                | [12]       |
| A-FeNC                                               | 0.850                                | [13]       |

**Table. S2 Summary of liquid and all-solid nitrogen-air cell performance using Fe-N-C cathode catalysts.**

| Materials                                    | Peak power density (mW cm <sup>-2</sup> ) | Specific capacity (mAh g <sup>-1</sup> ) | References |
|----------------------------------------------|-------------------------------------------|------------------------------------------|------------|
| FeZn-N-C-1                                   | 143.6                                     | 804                                      | This work  |
| Fe <sub>2</sub> N@NCNTs                      | 135                                       | 762                                      | [2]        |
| Fe-Co/Co <sub>3</sub> O <sub>4</sub> @NC-900 | 107.6                                     | —                                        | [3]        |
| Se/Fe-Co <sub>3</sub> O <sub>4</sub> /N-CNs  | 141.3                                     | 765.6                                    | [4]        |
| Fe/Fe <sub>3</sub> C@N-doped CNTs            | 206                                       | 781                                      | [6]        |
| FeSb/NC                                      | 175                                       | 751                                      | [8]        |
| FeCo/FeCoP@NMn-CNS-800                       | 135                                       | —                                        | [12]       |
| A-FeNC                                       | 102.2                                     | —                                        | [13]       |
| Fe-N-HPC                                     | 164.8                                     | 735                                      | [14]       |
| Fe/Fe <sub>3</sub> C@Fe-N <sub>x</sub> -C    | 147                                       | —                                        | [15]       |
| Cu/Fe/NeCNS                                  | 76.4                                      | —                                        | [16]       |
| CoFeNi@CNT                                   | 152.3                                     | 814                                      | [17]       |
| SA-Fe-NC                                     | 164                                       | 806                                      | [18]       |

## References

- [1] M. Wang, W. Yang, X. Li, Y. Xu, L. Zheng, C. Su, B. Liu, Atomically Dispersed Fe–Heteroatom (N, S) Bridge Sites Anchored on Carbon Nanosheets for Promoting Oxygen Reduction Reaction, *ACS Energy Letters*, 6 (2021) 379-386.
- [2] X. He, Y. Zhang, J. Wang, J. Li, L. Yu, F. Zhou, J. Li, X. Shen, X. Wang, S. Wang, H. Jin, Biomass-Derived Fe<sub>2</sub>N@NCNTs from Bioaccumulation as an Efficient Electrocatalyst for Oxygen Reduction and Zn–Air Battery, *ACS Sustainable Chemistry & Engineering*, 10 (2022) 9105-9112.
- [3] Q.-H. Kong, X.-W. Lv, C.-C. Weng, J.-T. Ren, W.-W. Tian, Z.-Y. Yuan, Curving Engineering of Hollow Concave-Shaped Rhombic Dodecahedrons of N-Doped Carbon Encapsulated with Fe-Doped Co/Co<sub>3</sub>O<sub>4</sub> Nanoparticles for an Efficient Oxygen Reduction Reaction and Zn–Air Batteries, *ACS Sustainable Chemistry & Engineering*, 10 (2022) 11441-11450.
- [4] H. Zhao, H. Yao, S. Wang, Y. Cao, Z. Lu, J. Xie, J. Hu, A. Hao, Doping-engineered bifunctional oxygen electrocatalyst with Se/Fe-doped Co<sub>3</sub>O<sub>4</sub>/N-doped carbon nanosheets as highly efficient rechargeable zinc-air batteries, *Journal of Colloid and Interface Science*, 626 (2022) 475-485.
- [5] G. Li, K. Sheng, Y. Lei, J. Yang, Y. Chen, X. Guo, G. Chen, B. Chang, T. Wu, X. Wang, Facile synthesis of Fe<sub>3</sub>C-dominated Fe/Fe<sub>3</sub>C/FeN<sub>0.0324</sub> multiphase nanocrystals embedded in nitrogen-modified graphitized carbon as efficient pH-universal catalyst for oxygen reduction reaction and zinc-air battery, *Chemical Engineering Journal*, 451 (2023) 138823.
- [6] W.W. Xie, T.Z. Tian, M. Yang, N.W. Li, L. Yu, Formation of hollow frameworks of dual-sided Fe/Fe<sub>3</sub>C@N-doped carbon nanotubes as bifunctional oxygen electrocatalyst for Zn-air batteries, *Applied Catalysis B: Environmental*, 317 (2022) 121760.
- [7] Y. Ma, S. Luo, M. Tian, J.E. Lu, Y. Peng, C. Desmond, Q. Liu, Q. Li, Y. Min, Q. Xu, S. Chen, Hollow carbon spheres codoped with nitrogen and iron as effective electrocatalysts for oxygen reduction reaction, *Journal of Power Sources*, 450 (2020)

227659.

[8] X. Xie, P. Sun, W. Liu, T. Gong, X. Lv, L. Fang, Y. Wei, X. Sun, Novel Fe<sub>2.55</sub>Sb<sub>2</sub> alloy nanoparticles incorporated in N-doped carbon as a bifunctional oxygen electrocatalyst for rechargeable Zn–air batteries, *New Journal of Chemistry*, 46 (2022) 13504-13512.

[9] C. Maouche, Y. Wang, C. Cheng, W. Wang, Y. Li, W.A. Qureshi, P. Huang, A. Amjad, Y. Zhou, J. Yang, Sulfur doped FeNC catalysts derived from Dual-Ligand zeolitic imidazolate framework for the oxygen reduction reaction, *Journal of Colloid and Interface Science*, 623 (2022) 146-154.

[10] A. Yu, W. Long, L. Zhu, Y. Zhao, P. Peng, F.-F. Li, Transformation of postsynthesized F-MOF to Fe/N/F-tridoped carbon nanotubes as oxygen reduction catalysts for high power density Zn-air batteries, *Chinese Chemical Letters*, (2022) 107860.

[11] T. Wang, C. Sun, Y. Yan, F. Li, Understanding the active sites of Fe–N–C materials and their properties in the ORR catalysis system, *RSC Advances*, 12 (2022) 9543-9549.

[12] Y.-P. Chen, S.-Y. Lin, R.-M. Sun, A.-J. Wang, L. Zhang, X. Ma, J.-J. Feng, FeCo/FeCoP encapsulated in N, Mn-codoped three-dimensional fluffy porous carbon nanostructures as highly efficient bifunctional electrocatalyst with multi-components synergistic catalysis for ultra-stable rechargeable Zn-air batteries, *Journal of Colloid and Interface Science*, 605 (2022) 451-462.

[13] M. Lv, H. Guo, H. Shen, J. Wang, J. Wang, Y. Shimakawa, M. Yang, Fe<sub>3</sub>C cluster-promoted single-atom Fe, N doped carbon for oxygen-reduction reaction, *Physical Chemistry Chemical Physics*, 22 (2020) 7218-7223.

[14] D. Wang, H. Xu, P. Yang, L. Xiao, L. Du, X. Lu, R. Li, J. Zhang, M. An, A dual-template strategy to engineer hierarchically porous Fe–N–C electrocatalysts for the high-performance cathodes of Zn–air batteries, *Journal of Materials Chemistry A*, 9 (2021) 9761-9770.

[15] L. Zong, X. Chen, S. Liu, K. Fan, S. Dou, J. Xu, X. Zhao, W. Zhang, Y. Zhang, W. Wu, F. Lu, L. Cui, X. Jia, Q. Zhang, Y. Yang, J. Zhao, X. Li, Y. Deng, Y. Chen,

L. Wang, Ultrafine Fe/Fe<sub>3</sub>C decorated on Fe-N<sub>x</sub>-C as bifunctional oxygen electrocatalysts for efficient Zn-air batteries, *Journal of Energy Chemistry*, 56 (2021) 72-79.

[16] M. Wang, P. Gao, D. Li, X. Wu, M. Yang, Z. Li, Y. Shen, X. Hu, Y. Liu, Z. Chen, Cu/Fe dual atoms catalysts derived from Cu-MOF for Zn-air batteries, *Materials Today Energy*, 28 (2022) 101086.

[17] D. Chen, G. Li, X. Chen, Q. Zhang, J. Sui, C. Li, Y. Zhang, J. Hu, J. Yu, L. Yu, L. Dong, Developing nitrogen and Co/Fe/Ni multi-doped carbon nanotubes as high-performance bifunctional catalyst for rechargeable zinc-air battery, *Journal of Colloid and Interface Science*, 593 (2021) 204-213.

[18] X. Liang, Z. Li, H. Xiao, T. Zhang, P. Xu, H. Zhang, Q. Gao, L. Zheng, Two Types of Single-Atom FeN<sub>4</sub> and FeN<sub>5</sub> Electrocatalytic Active Centers on N-Doped Carbon Driving High Performance of the SA-Fe-NC Oxygen Reduction Reaction Catalyst, *Chemistry of Materials*, 33 (2021) 5542-5554.
